# Supplementary material for: Enhanced NO2sensing performance of reduced graphene oxide by in situ anchoring carbon dots
Source: Royal Society of Chemistry journal article supplement (doi:10.1039/c7tc01208j), 2017-01-01
Supplement: c7tc01208j1.pdf [file c7tc01208j1.pdf]

## Electronic Supplementary Information

### **Enhanced NO<sub>2</sub> sensing performance of reduced graphene oxide by *in-situ* anchoring carbon dots**

Jing Hu,<sup>a</sup> Cheng Zou,<sup>a</sup> Yanjie Su,<sup>\*a</sup> Ming Li,<sup>a</sup> Nantao Hu,<sup>a</sup> Hui Ni,<sup>a</sup> Zhi Yang,<sup>a</sup> and Yafei Zhang<sup>\*a</sup>

- a. Key Laboratory for Thin Film and Microfabrication of the Ministry of Education, Department of Micro/Nano Electronics, School of Electronics, Information and Electrical Engineering, Shanghai Jiao Tong University, Shanghai 200240, PR China.

\* Corresponding author, Tel:+86-021-34205665; Fax: +86-021-34205665; Email: [yanjiesu@sjtu.edu.cn](mailto:yanjiesu@sjtu.edu.cn), [yfzhang@sjtu.edu.cn](mailto:yfzhang@sjtu.edu.cn).

## Preparation of GO

Typically, a 9:1 mixture of concentrated  $\text{H}_2\text{SO}_4/\text{H}_3\text{PO}_4$  (360:40 mL) was added to a mixture of graphite flakes (3.0 g) and  $\text{KMnO}_4$  (18.0 g). The reaction was then heated to 50 °C and stirred for 12 h. The reaction was cooled to room temperature and poured onto ice (400 mL) with 30 %  $\text{H}_2\text{O}_2$  (3.0 mL). After that, the mixture was centrifuged (5000 rpm for 30 min) to remove the residual of graphite flakes. Then the obtained solution was centrifuged (5000 rpm for 4 h), and the supernatant was decanted away. The remaining solid material was then redispersed in 200 mL of water and separated by centrifugation and washed several times with 5 %  $\text{HCl}$  solution. The product was then washed several times with distilled water and dried overnight in an oven at 60 °C.<sup>1</sup>

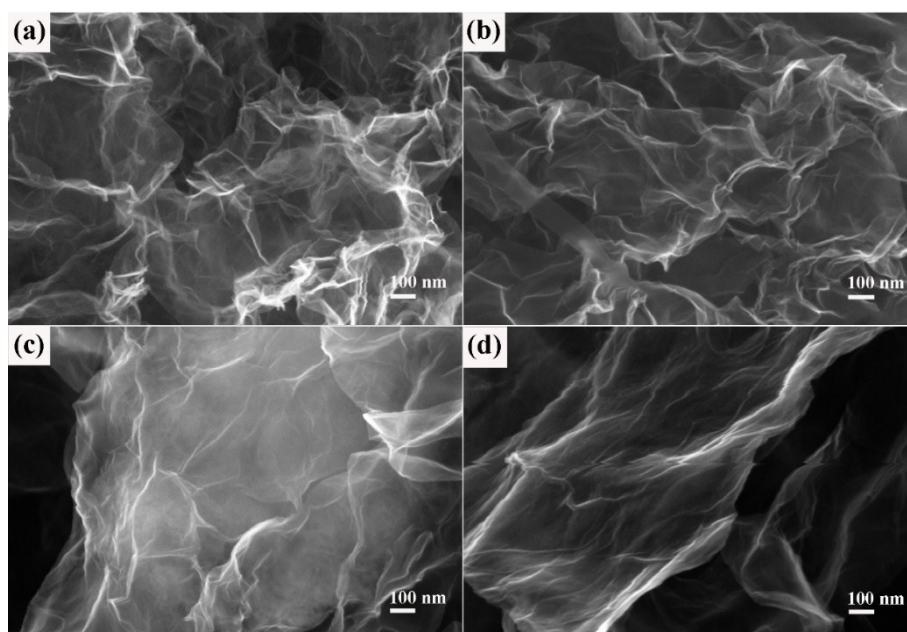

**Fig. S1** SEM images of the GO nanosheet (a), rGO(300/1-air) nanosheet (b), rGO-CDs hybrids (c) and rGO-CDs(300/1-air) hybrids (b).

XRD pattern and FTIR spectra of GO:

As shown in Fig. S2a, the GO exhibit a sharp peak (002) at  $2\theta = 11.6^\circ$  corresponding to the presence of various types of atomic-level structural defects ( $sp^3$  bonding) and nanoholes, various oxygen functionalities (e.g., OH,  $CO_2H$ ), and intercalated water molecules attached to both sides of the GO.<sup>2, 3</sup> In Fig. S2b, the wide and strong band of GO at  $3400\text{ cm}^{-1}$  indicated the existence of hydroxyl groups, while the strong band at  $\sim 2850\text{ cm}^{-1}$  and  $\sim 1750\text{ cm}^{-1}$  corresponded to the C-H and C=O groups. The band at  $\sim 1620\text{ cm}^{-1}$  was for the aromatic C=C groups, while the peak at  $\sim 1072\text{ cm}^{-1}$  was for the C-O groups and  $\sim 1250\text{ cm}^{-1}$  for the C-OH stretching.<sup>2</sup> The other characteristic peaks at  $\sim 1380$  and  $\sim 1067\text{ cm}^{-1}$  were assigned to C-O-C asymmetric and symmetric vibrations, respectively.

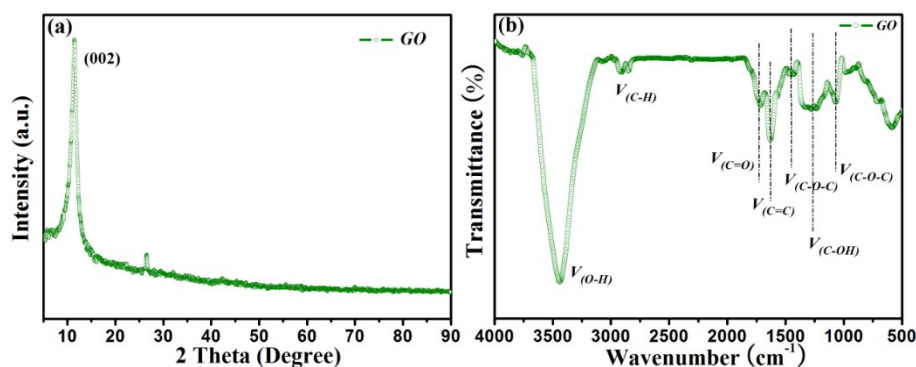

**Fig. S2** (a) XRD pattern of GO. (b) FTIR spectra of GO.

Sensing response of rGO-CDs hybrids synthesized by various temperature, weight of citric acid, volume of ethylenediamine and time, respectively. The synthesis experiments followed the principle of single variable.

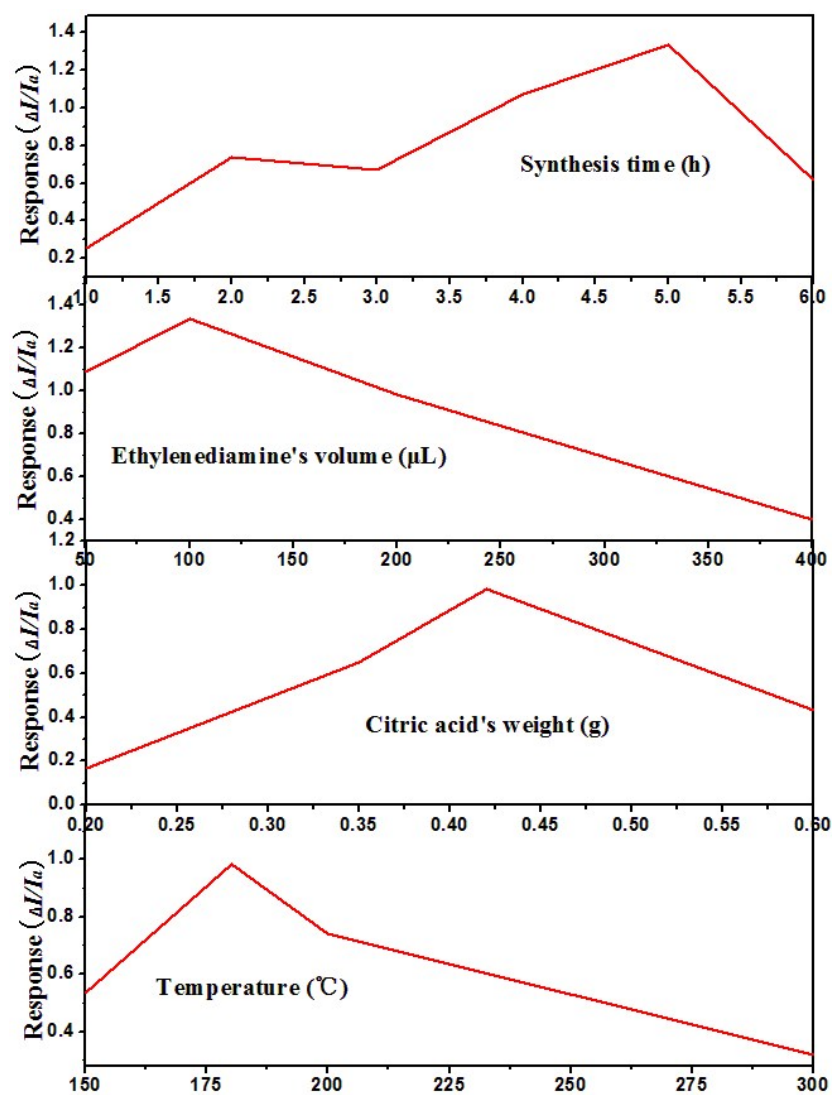

**Fig. S3** Response of the rGO-CDs synthesis by different temperature, weight of citric acid, volume of ethylenediamine and time upon exposure to 50 ppm NO<sub>2</sub> gas, respectively.

As shown in Fig. S4, with 0.42 g citric acid and 5 mL 0.45 mg/mL GO aqueous solution, various weight of urea was hydrothermal treated at 180 °C for 5 h. The obtained products were annealed at 300 °C for 1 h and then measured their sensing characteristics of 50 ppm NO<sub>2</sub> gas at room temperature.

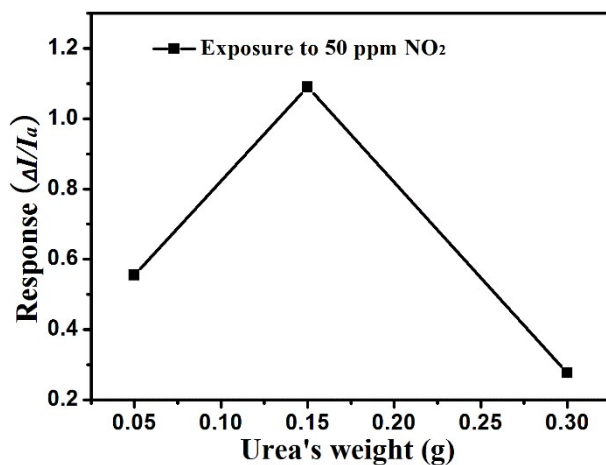

**Fig. S4** Response of the rGO-CDs synthesis by different weight of urea.

Raman spectra of GO, rGO, rGO(300/1-air), rGO-CDs, rGO-CDs(300/1-air), rGO-CDs(300/1-N<sub>2</sub>) and rGO-CDs(300/2-air) in Fig. S5a were tested at room temperature. TGA curves of rGO under air flow, rGO-CDs under air flow and N<sub>2</sub> flow were shown in Fig. S5c. The rGO-CDs of different annealing conditions were exposure to 50 ppm of NO<sub>2</sub> gas to check the sensing performance. The results were illustrated in Fig. S5d.

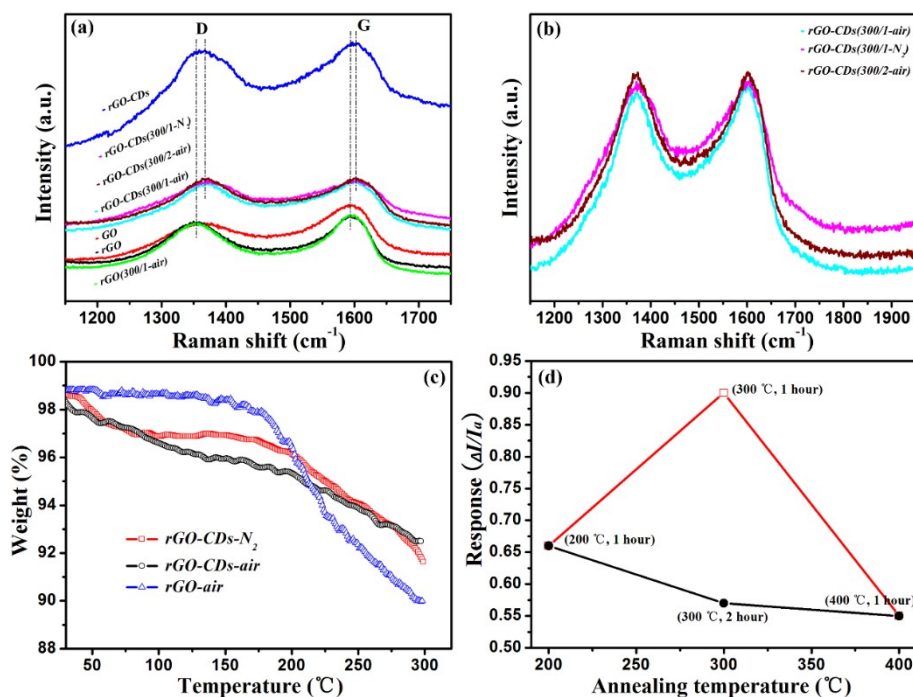

**Fig. S5** (a) Raman spectra of GO, rGO, rGO(300/1-air), rGO-CDs, rGO-CDs(300/1-air), rGO-CDs(300/1-N<sub>2</sub>) and rGO-CDs(300/2-air), respectively. (b) Partial enlarged Raman spectra of rGO-CDs(300/1-air), rGO-CDs(300/1-N<sub>2</sub>) and rGO-CDs(300/2-air), respectively. (c) TGA analyses of rGO under air flow, rGO-CDs under air flow and N<sub>2</sub> flow. (d) Response of the rGO-CDs annealed by different temperature and time upon exposure to 50 ppm of NO<sub>2</sub> gas.

Micrographs of rGO-CDs(300/1-air) and rGO-CDs(300/1-N<sub>2</sub>) hybrids:

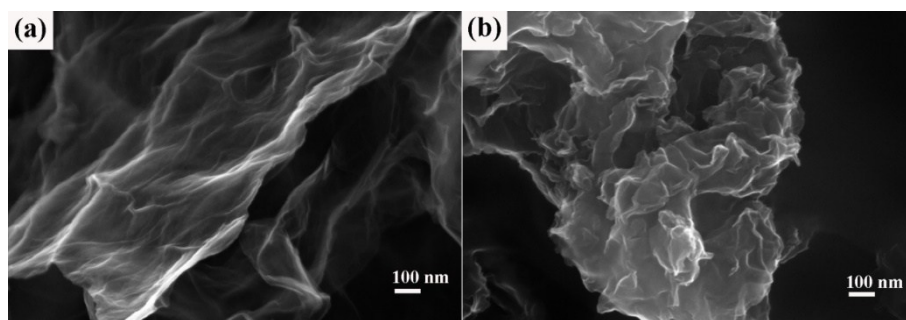

**Fig. S6** SEM images of the rGO-CDs(300/1-air) (a) and rGO-CDs(300/1-N<sub>2</sub>) hybrids (b).

Fig. S6 shows the SEM images of the rGO-CDs(300/1-air) and rGO-CDs(300/1-N<sub>2</sub>), from which we can find both of the surface of hybrids are rough, beyond that no difference can be find between them.

Micrographs of different rGO-CDs(300/1-air) ethanol solutions deposited on the interdigital electrode:

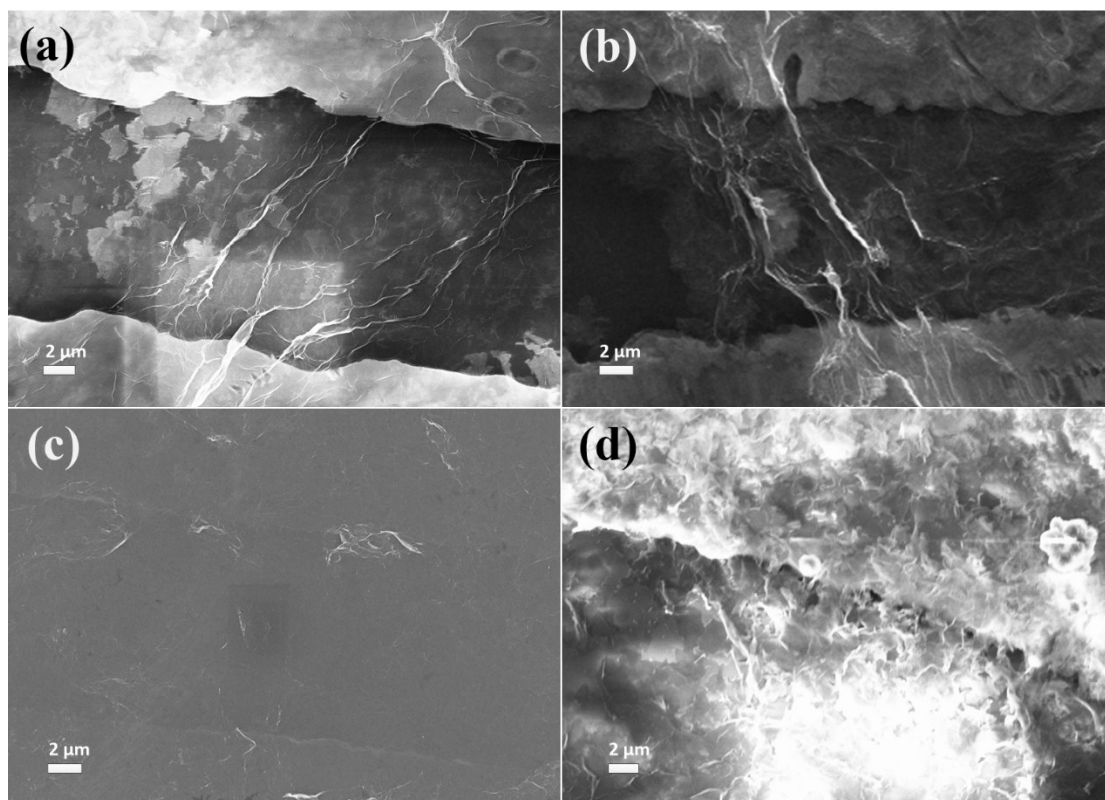

**Fig. S7** The SEM images of the interdigital electrode after deposited with 2.0  $\mu\text{L}$  of (a) 0.5  $\text{mg mL}^{-1}$ , (b) 1.0  $\text{mg mL}^{-1}$ , (c) 2.0  $\text{mg mL}^{-1}$  and (d) 5.0  $\text{mg mL}^{-1}$  rGO-CDs(300/1-air) ethanol solution.

**Table S1** Performance Comparison of the NO<sub>2</sub> Sensors synthesized by different reductants

| Citric acid | Reductant              | GO<br>(0.45 mg/mL) | Synthetic<br>conditions | Sensitivity<br>(exposure to 50 ppm NO <sub>2</sub> ) |
|-------------|------------------------|--------------------|-------------------------|------------------------------------------------------|
| 0.42 g      | Ethanediamine (100 µL) | 5 mL               | 180°C/5 h               | 136.2%                                               |
| 0.42 g      | Urea (0.15 g)          | 5 mL               | 180°C/5 h               | 108.9%                                               |
| 0.42 g      | Hexamine (0.15 g)      | 5 mL               | 180°C/5 h               | 72.7%                                                |
| 0.42 g      | Vitamin C (0.15 g)     | 5 mL               | 180°C/5 h               | 10.9%                                                |
| 0.42 g      | Thiourea (0.15 g)      | 5 mL               | 180°C/5 h               | 4.1%                                                 |
| 0.42 g      | Thioacetamide (0.15 g) | 5 mL               | 180°C/5 h               | 7.0%                                                 |

**Table S2** Performance Comparison of the NO<sub>2</sub> Sensors by different synthetic methods

| Composition of the reactants     | Synthetic<br>method | Synthetic<br>conditions | Sensitivity<br>(exposure to 50 ppm NO <sub>2</sub> 100 s) |
|----------------------------------|---------------------|-------------------------|-----------------------------------------------------------|
| Citric acid + Ethanediamine + GO | Hydrothermal        | 180°C/5 h               | 136.2%                                                    |
| CDs + GO                         | Hydrothermal        | 180°C/5 h               | 98.5%                                                     |
| CDs + GO                         | Reflux              | 180°C/5 h               | 85%                                                       |

**Table S3** Performance Comparison of the NO<sub>2</sub> Sensors synthesized by different ingredients

| Citric acid | Ethanediamine | GO<br>(0.45 mg/mL) | Synthetic conditions | Sensitivity<br>(exposure to 50 ppm NO <sub>2</sub> ) |
|-------------|---------------|--------------------|----------------------|------------------------------------------------------|
| 0.42 g      | -             | 5 mL               | 180°C/5 h            | 39.3%                                                |
| -           | 200 µL        | 5 mL               | 180°C/5 h            | 16.1%                                                |
| -           | -             | 5 mL               | 180°C/5 h            | 42.0%                                                |
| 0.42 g      | 200 µL        | 5 mL               | 180°C/5 h            | 98.4%                                                |
| 0.42 g      | 200 µL        | 10 mL              | 180°C/5 h            | 53.3%                                                |
| 0.42 g      | 200 µL        | -                  | 180°C/5 h            | -                                                    |

“-” equals none.

## Notes and references

- 1 D. C. Marcano, D. V. Kosynkin, J. M. Berlin, A. Sinitskii, Z. Sun, A. Slesarev, L. B. Alemany, W. Lu and J. M. Tour, *ACS Nano*, 2010, **4**, 4806-4814.
- 2 C.-I. Wang, A. P. Periasamy and H.-T. Chang, *Anal. Chem.*, 2013, **85**, 3263-3270.
- 3 Z. Fan, W. Kai, J. Yan, T. Wei, L. Zhi, J. Feng, Y. Ren, L. Song and F. Wei, *ACS Nano*, 2011, **5**, 191-198.
